# Supplementary material
Source: MDPI journal article supplement (https://www.mdpi.com/2072-4292/14/24/6399)
Supplement: s1 [file s1]

## Supplementary Material

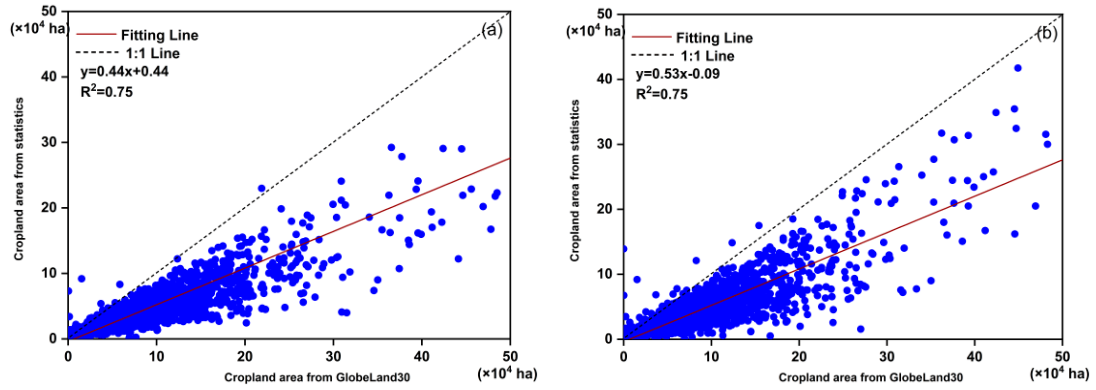

**Figure S1.** Cropland area in GlobeLand30 and statistical data correlations for 2000 and 2010. (a) the correlations in 2000. (b) the correlations in 2010. Each point presents the data of a county, in total 2396 counties were computed. Linear regression was used to measure the  $R^2$  with the red fitting line.

**Table S1.** Decomposition factors for a given county, mean parcel size, and number of parcels are calculated based on FRAGSTATS 4.2 software.  $yield_i^{2010}$  represents yield in 2010 in county  $i$ .

| Factor       | Symbol               | LMDI form                                                                                                                                        |
|--------------|----------------------|--------------------------------------------------------------------------------------------------------------------------------------------------|
| <i>Yield</i> | $\Delta C_{yield}^i$ | $\sum_i \frac{C_{total}^{2010} - C_{total}^{2000}}{\ln C_{total}^{2010} - \ln C_{total}^{2000}} \cdot \ln \frac{yield_i^{2010}}{yield_i^{2000}}$ |
| <i>MCI</i>   | $\Delta C_{MCI}^i$   | $\sum_i \frac{C_{total}^{2010} - C_{total}^{2000}}{\ln C_{total}^{2010} - \ln C_{total}^{2000}} \cdot \ln \frac{MCI_i^{2010}}{MCI_i^{2000}}$     |
| <i>MPS</i>   | $\Delta C_{MPS}^i$   | $\sum_i \frac{C_{total}^{2010} - C_{total}^{2000}}{\ln C_{total}^{2010} - \ln C_{total}^{2000}} \cdot \ln \frac{MPS_i^{2010}}{MPS_i^{2000}}$     |
| <i>NP</i>    | $\Delta C_{NP}^i$    | $\sum_i \frac{C_{total}^{2010} - C_{total}^{2000}}{\ln C_{total}^{2010} - \ln C_{total}^{2000}} \cdot \ln \frac{NP_i^{2010}}{NP_i^{2000}}$       |
